# Supplementary material for: Synthesis, characterization and evaluation of copper based nanoparticles as agrochemicals against Phytophthora infestans
Source: Royal Society of Chemistry journal article supplement (doi:10.1039/c3ra42118j), 2013-01-01
Supplement: c3ra42118j.pdf [file c3ra42118j.pdf]

## Supplementary Information

### Synthesis, Characterization and Evaluation of Copper based Nanoparticles as Agrochemicals against *Phytophthora infestans*

**K. Giannousi, I. Avramidis and C. Dendrinou-Samara\***

C. Dendrinou-Samara (Corresponding author)

Department of Chemistry, Aristotle University of Thessaloniki, 54124 Thessaloniki,  
Greece

e-mail: [samkat@chem.auth.gr](mailto:samkat@chem.auth.gr)

K. Giannousi

Department of Chemistry, Aristotle University of Thessaloniki, 54124 Thessaloniki,  
Greece

I. Avramidis

Agronomist, Field Trialist, Agrolab SA private sector

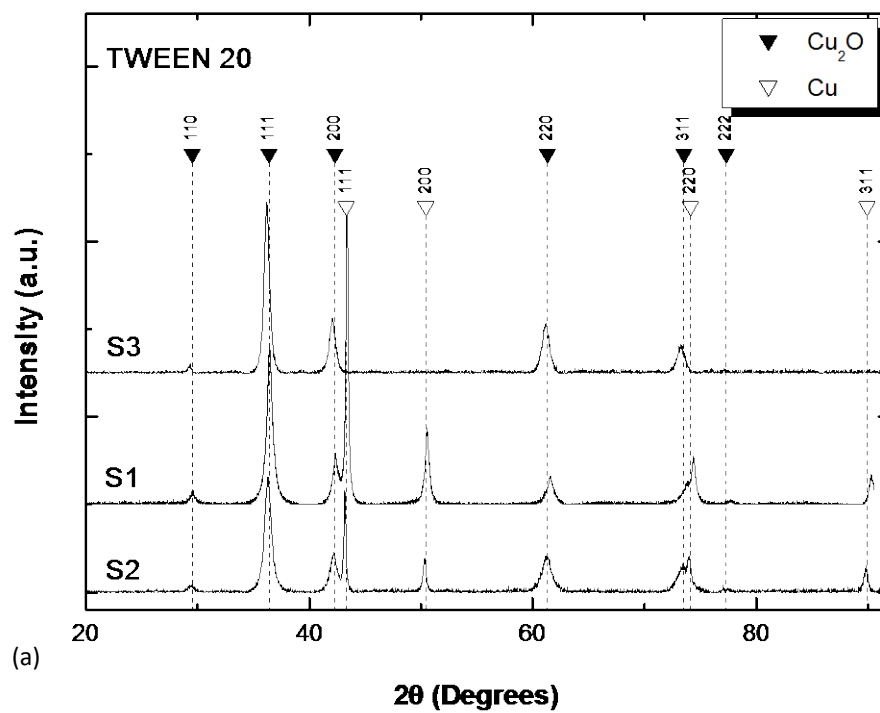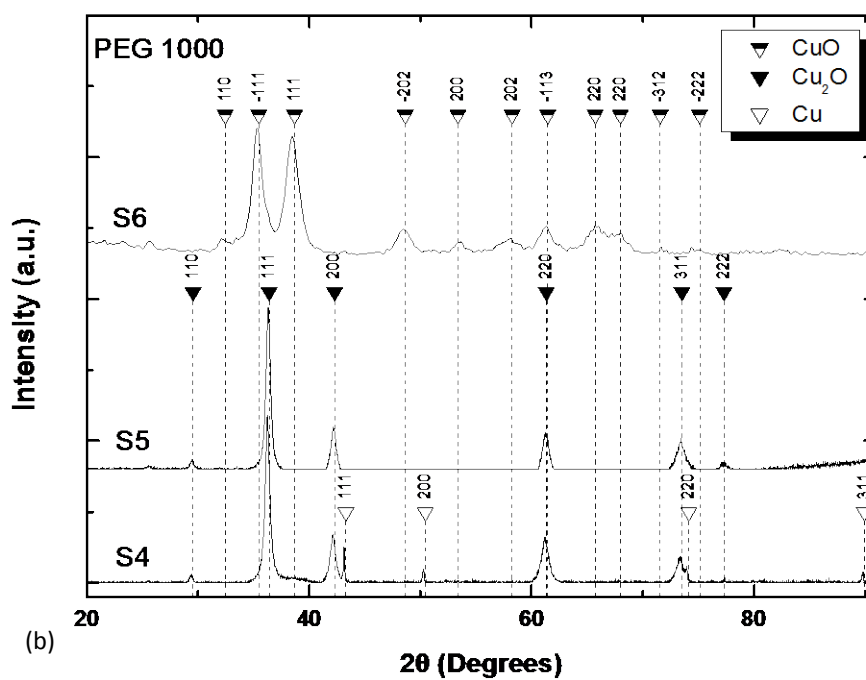

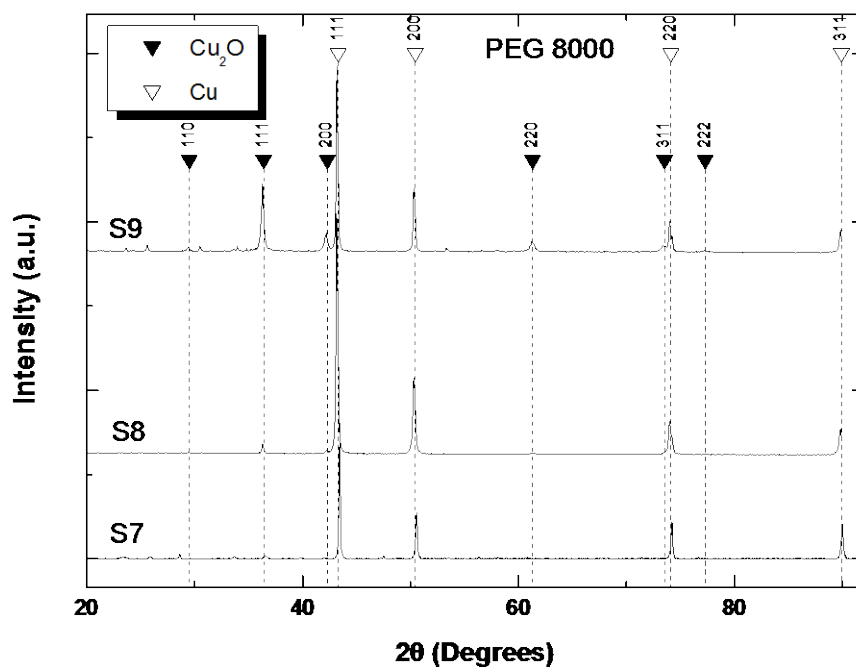

Figure S1. XRD patterns of: (a) samples S1-S3 prepared in presence of TWEEN 20, samples S4-S6 prepared in presence of PEG 1000 (b), samples S7-S9 prepared in presence of PEG 8000 (c). Vertical lines denote expected diffraction peak positions for CuO (black and white triangles),  $\text{Cu}_2\text{O}$  (full triangles) and Cu (open triangles).

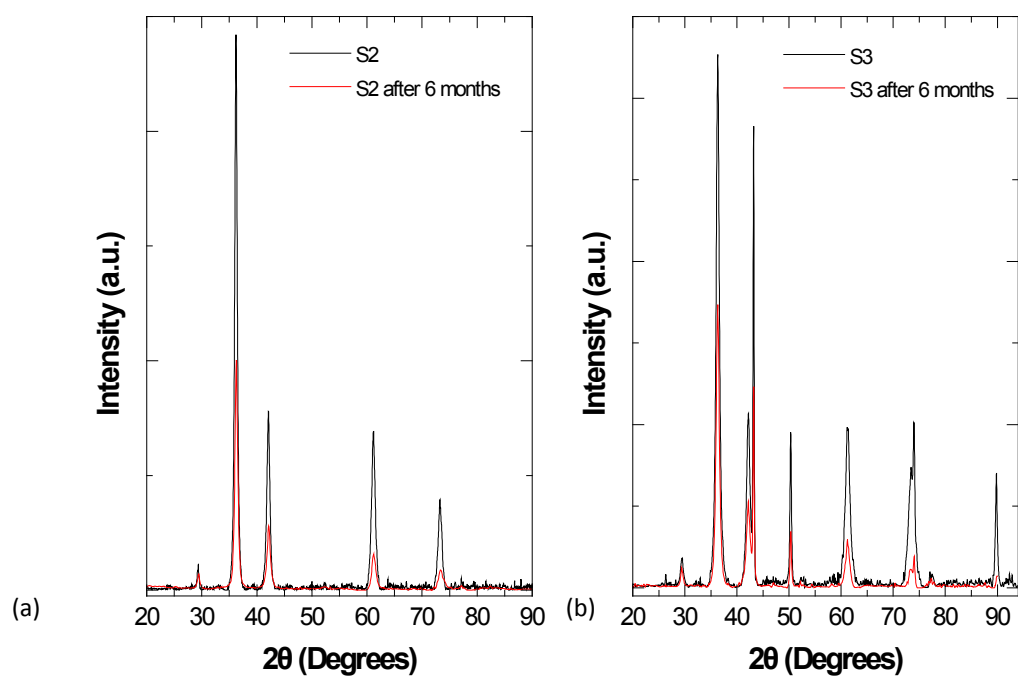

Figure S2. XRD patterns of samples S2 (a) and S3 (b). Dotted lines illustrate the XRD patterns of samples S2 (a) and S3 (b) after six months.

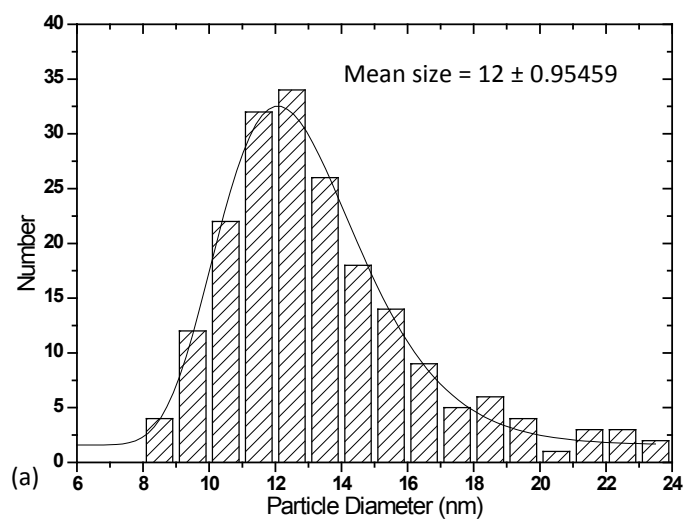

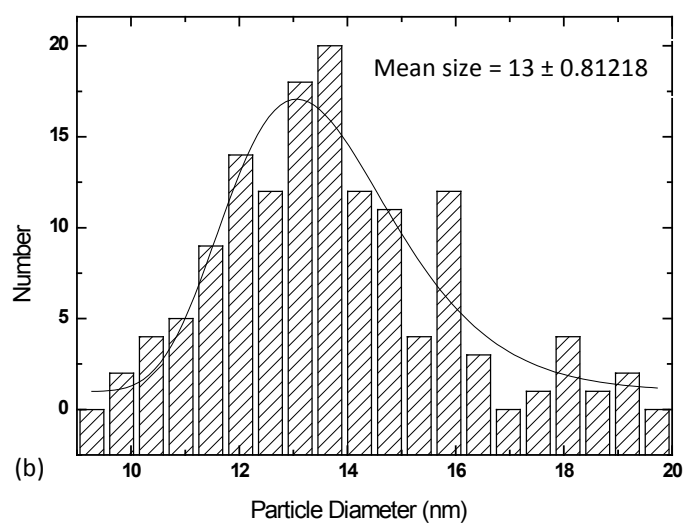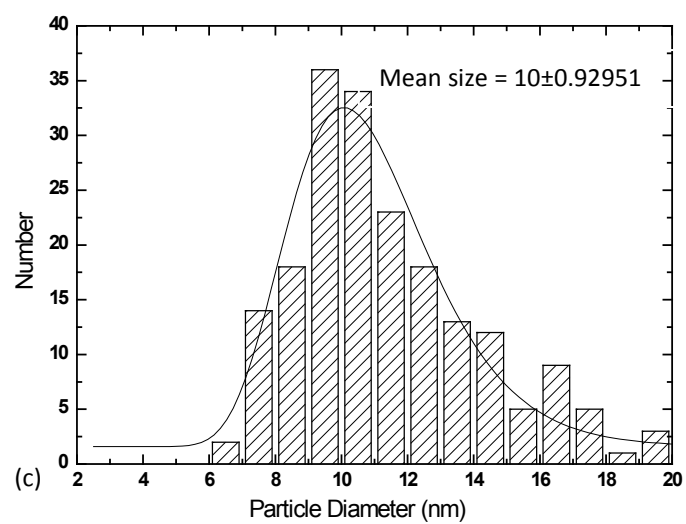

Figure S3. Particle size distribution histograms of samples S3 (a) S6 (b), S2 (c).
